# Supplementary material for: The immune landscape of the inflamed joint defined by spectral flow cytometry
Source: PubMed Central journal article supplement (PMC11557149; doi:10.1093/cei/uxae071), 2024-08-05
Supplement: uxae071_suppl_supplementary_materials.pdf [file uxae071_suppl_supplementary_materials.pdf]

**Table S1. Antibodies used in high dimensional flow cytometry panel for cellular composition and activation, proliferative and functional state of mononuclear cells; Antibodies used at appropriately tested titrations.**

| Fluorophore     | Marker         | Clone      |
|-----------------|----------------|------------|
| BUV395          | CD4            | SK3        |
| BUV496          | HLA-DR         | G46-6      |
| BUV563          | CD161          | DX12       |
| BUV615          | CD16           | 3G8        |
| BUV661          | 4-1BB (CD137)  | 4B4-1      |
| BUV737          | CD25           | 2A3        |
| BUV805          | CD39           | TU66       |
| BV421           | TNFR2 (CD120b) | hTNFR-M1   |
| SB436           | CD123          | 6H6        |
| eFluor450       | ID2*           | ILCID2     |
| BV480           | CD127          | HIL-7R-M21 |
| BV510           | CD71           | M-A712     |
| BV570           | CD56           | 5.1H11     |
| BV605           | CTLA-4*(CD152) | BNI3       |
| BV650           | Ki67*          | B56        |
| BV711           | CD226 (DNAM-1) | 11A8       |
| BV750           | GARP           | 7B11       |
| BV785           | CD69           | FN50       |
| Qdot 800        | CD14           | TuK4       |
| BB515           | CD96           | 6F9        |
| AF488           | GITR (CD357)   | 108-17     |
| AF532           | CD45RA         | HI100      |
| BB700           | PD-1 (CD279)   | EH12.1     |
| PerCP-eFluor710 | Lap            | FNLAP      |
| PE              | Foxp3*         | 236A/E7    |
| PE-CF594        | CD11c          | 3.9        |
| PE-Cy5          | CD19           | HIB19      |
| PC-Cy7          | CD112          | TX31       |
| APC             | CD155 (PVR)    | SKII.4     |
| AF647           | TIGIT          | MBSA43     |
| AF700           | Helios*        | 22F6       |
| eFluor 780      | FVD            | ---        |
| APC-Fire810     | CD3            | SK7        |

\*stained intracellularly after FoxP3/transcription factor fixation/permeabilization buffer

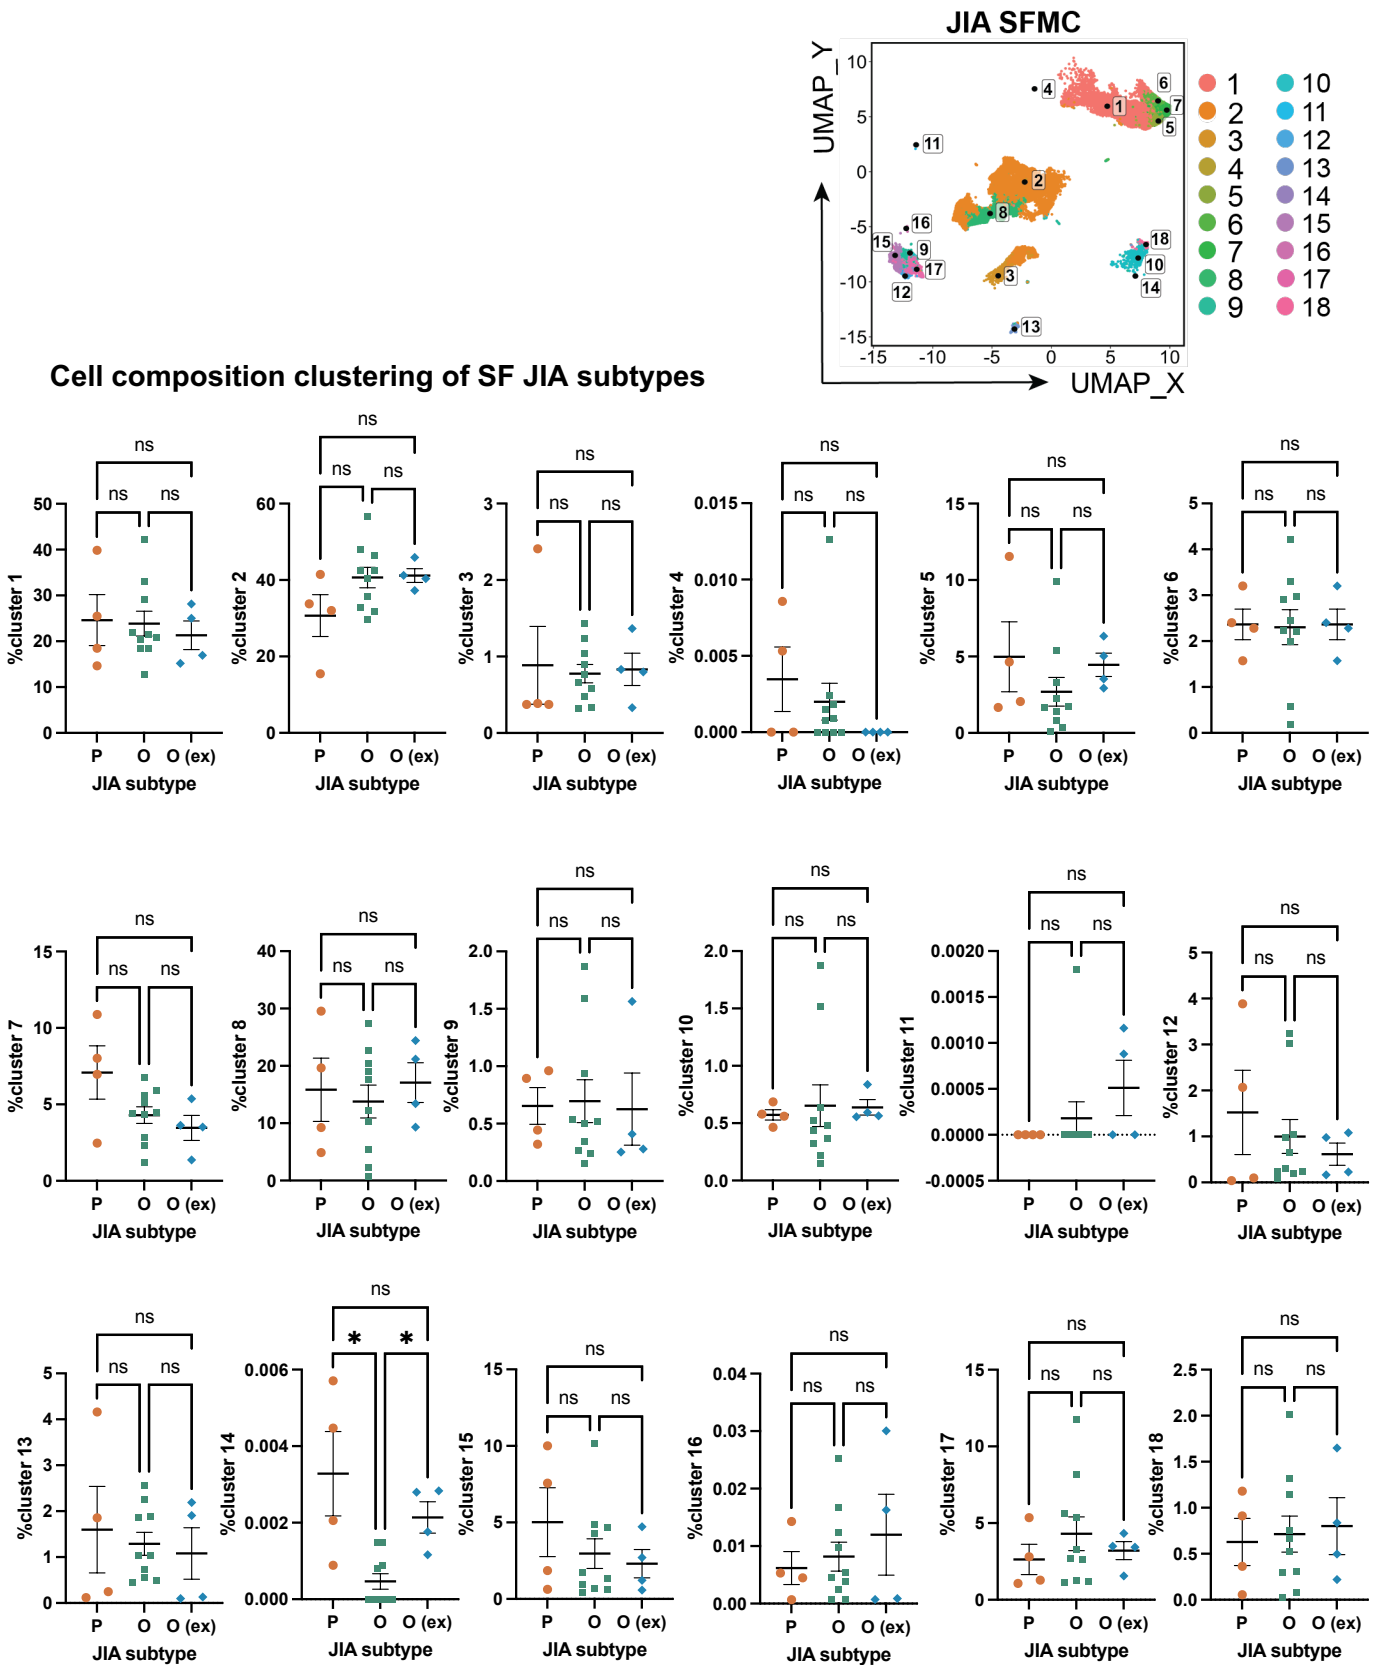

**Supplementary Figure S1. Cell composition cluster frequencies divided by JIA subtypes**

Significance determined by one-way ANOVA with Kruskal-Wallis multiple comparisons post hoc test. \* $p < 0.05$ . non-significant (ns)  $p$  values classified as  $p \geq 0.05$ . mean  $\pm$  SEM displayed. P= Polyarticular RF-; O= Oligoarticular (persistent); O (ex)= Oligoarticular (extended).

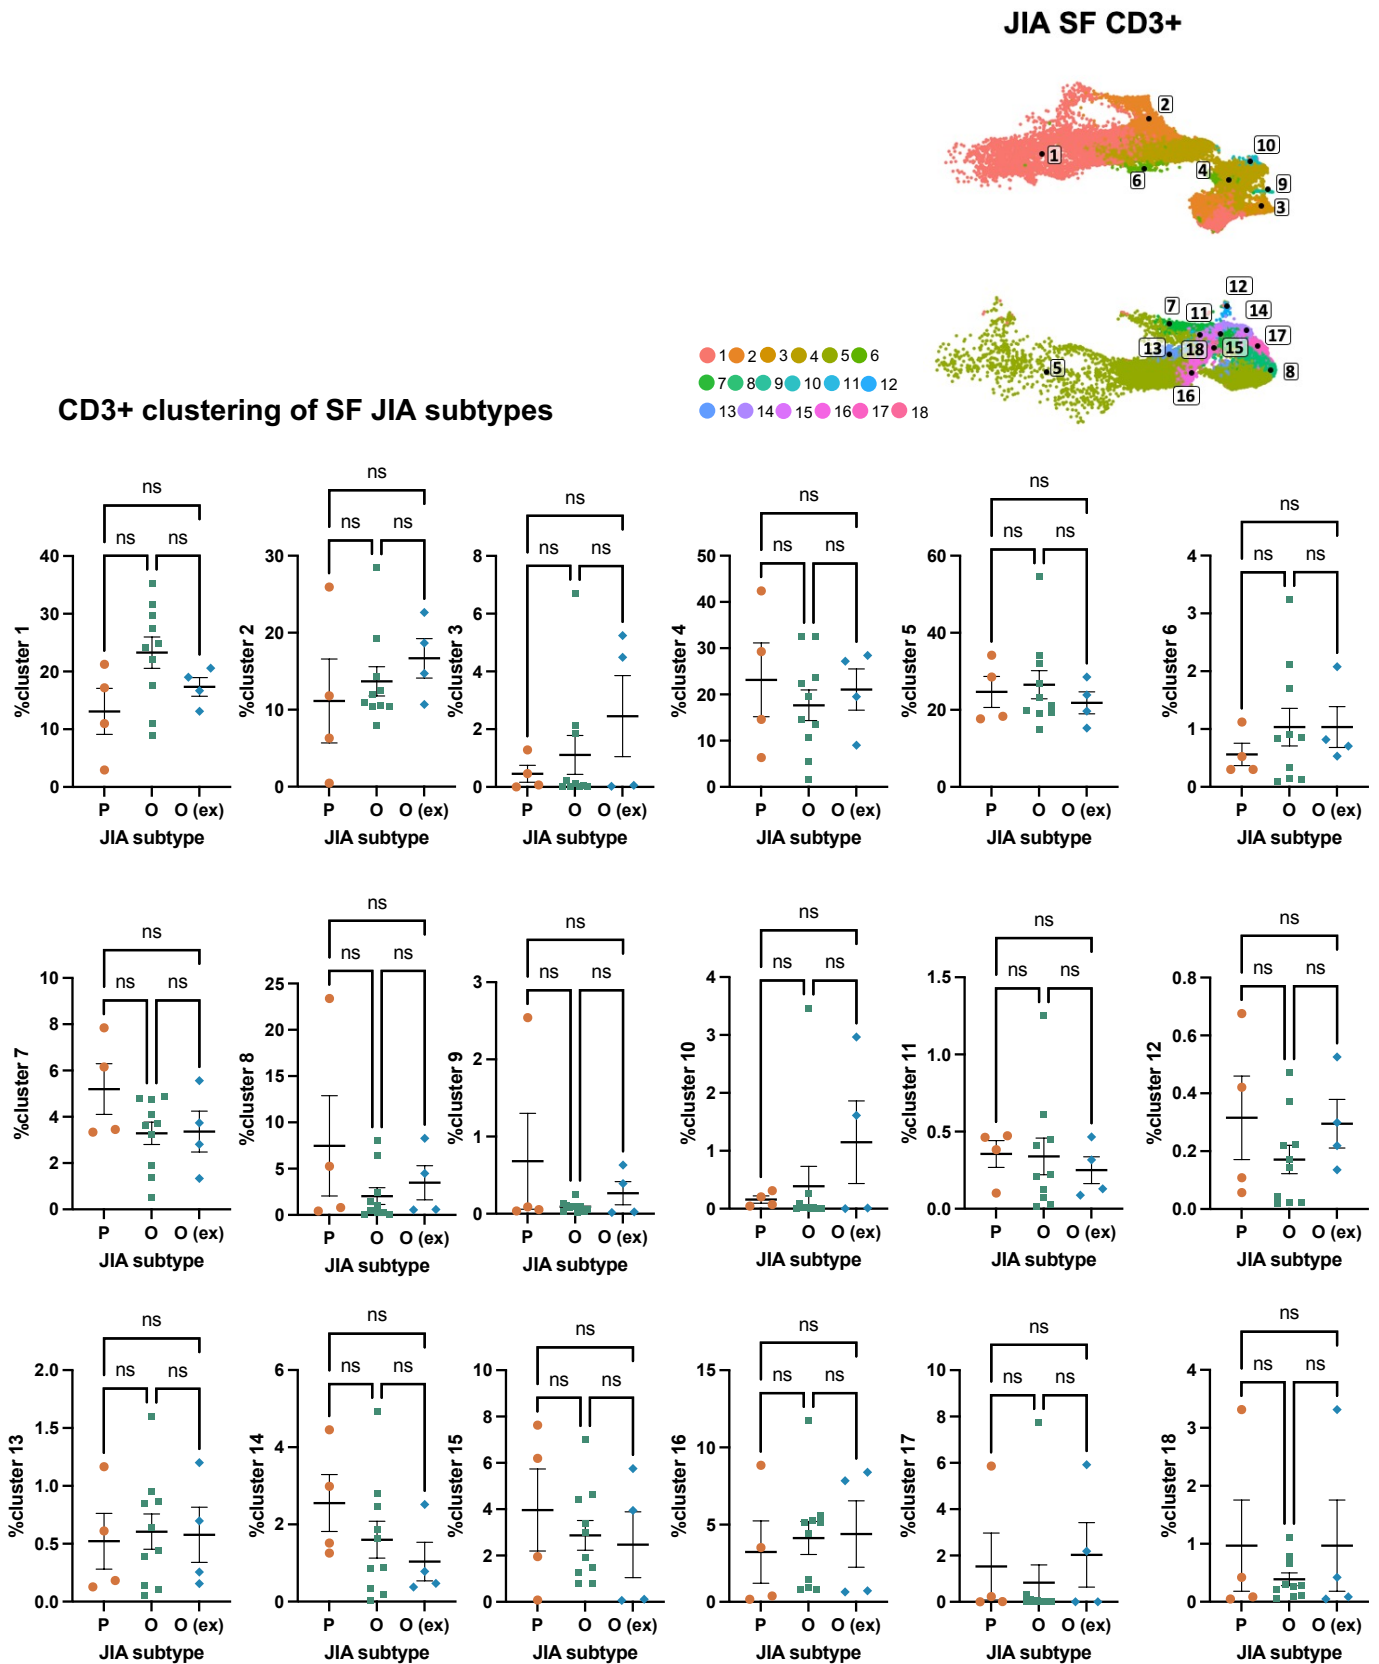

**Supplementary Figure S2. CD3+ T cell cluster frequencies divided by JIA subtypes**

Significance determined by one-way ANOVA with Kruskal-Wallis multiple comparisons post hoc test. \* $p < 0.05$ . non-significant (ns) p values classified as  $p \geq 0.05$ . mean  $\pm$  SEM displayed. P= Polyarticular RF-; O= Oligoarticular (persistent); O (ex)= Oligoarticular (extended).

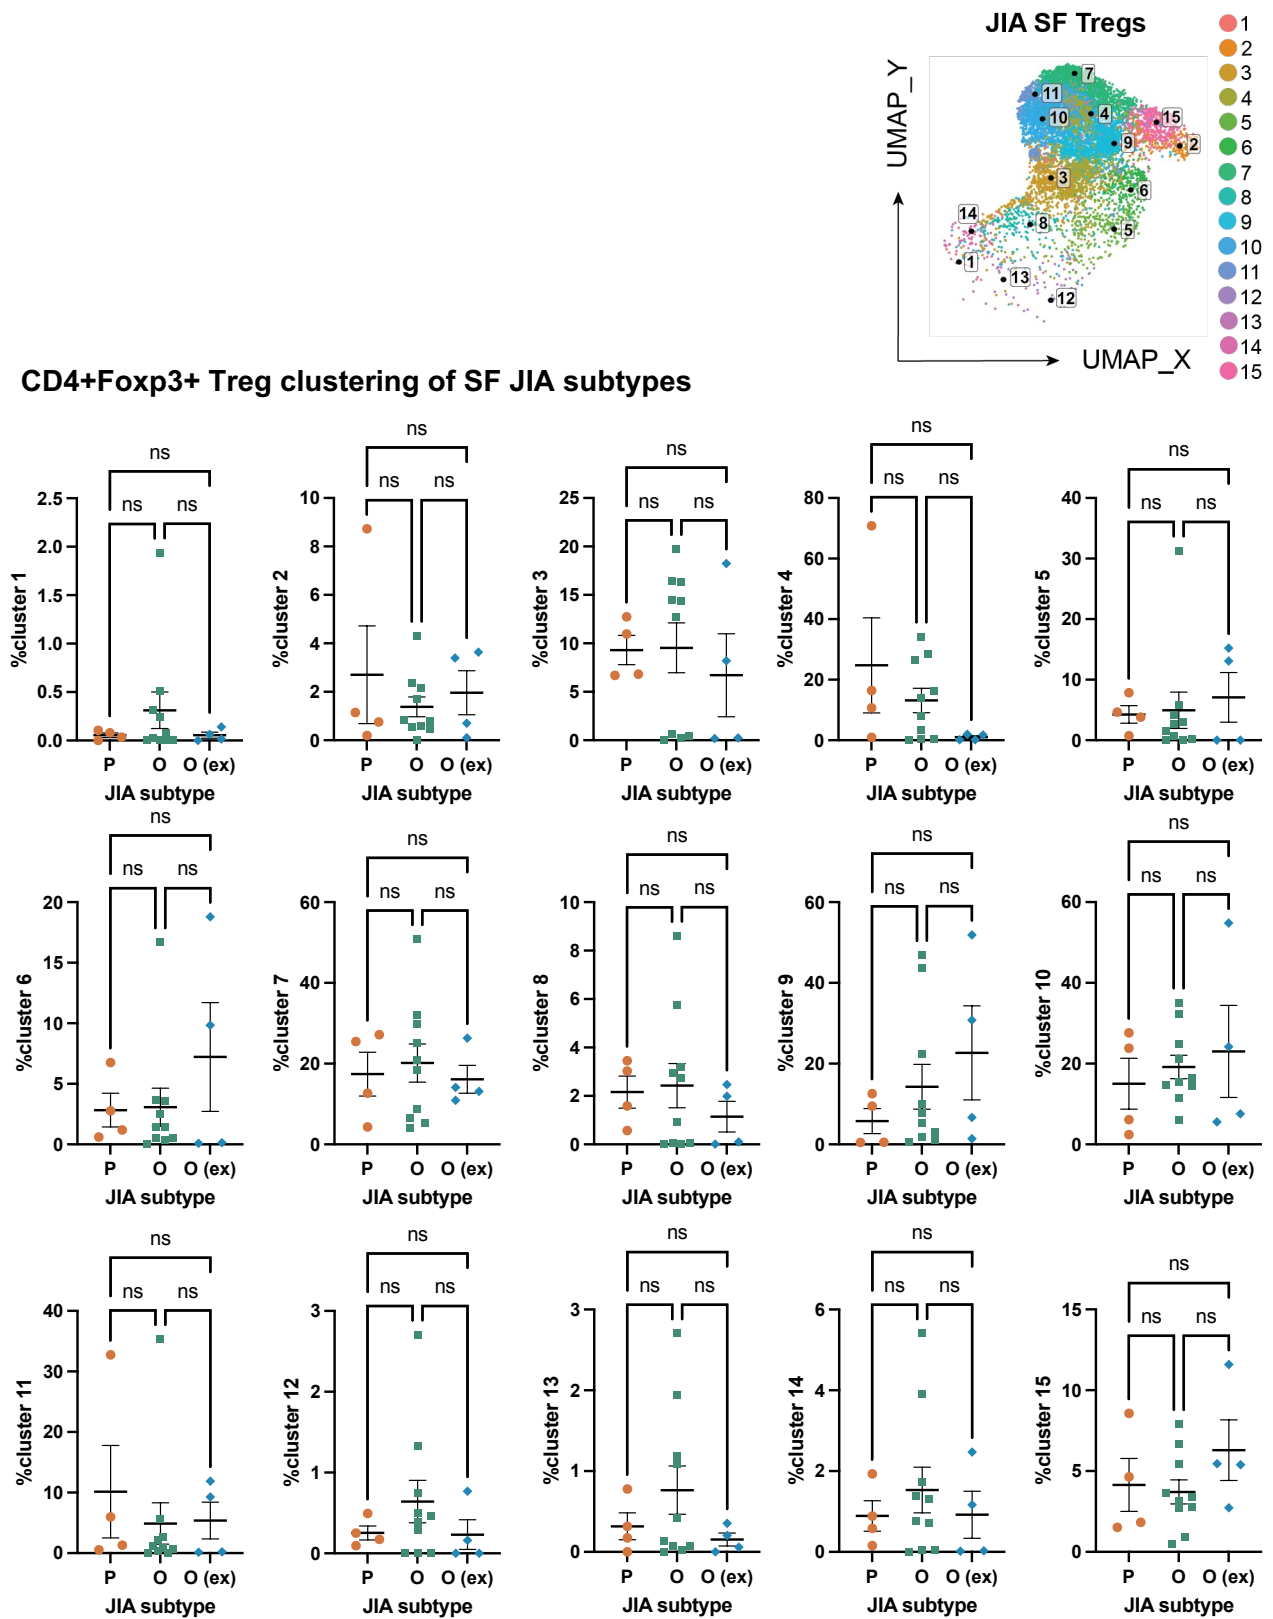

**Supplementary Figure S3. CD4+Foxp3+ Treg cluster frequencies divided by JIA subtypes**

Significance determined by one-way ANOVA with Kruskal-Wallis multiple comparisons post hoc test. \* $p < 0.05$ . non-significant (ns)  $p$  values classified as  $p \geq 0.05$ . mean  $\pm$  SEM displayed. P= Polyarticular RF-; O= Oligoarticular (persistent); O (ex)= Oligoarticular (extended).

Gated on CD3+CD56- T cells

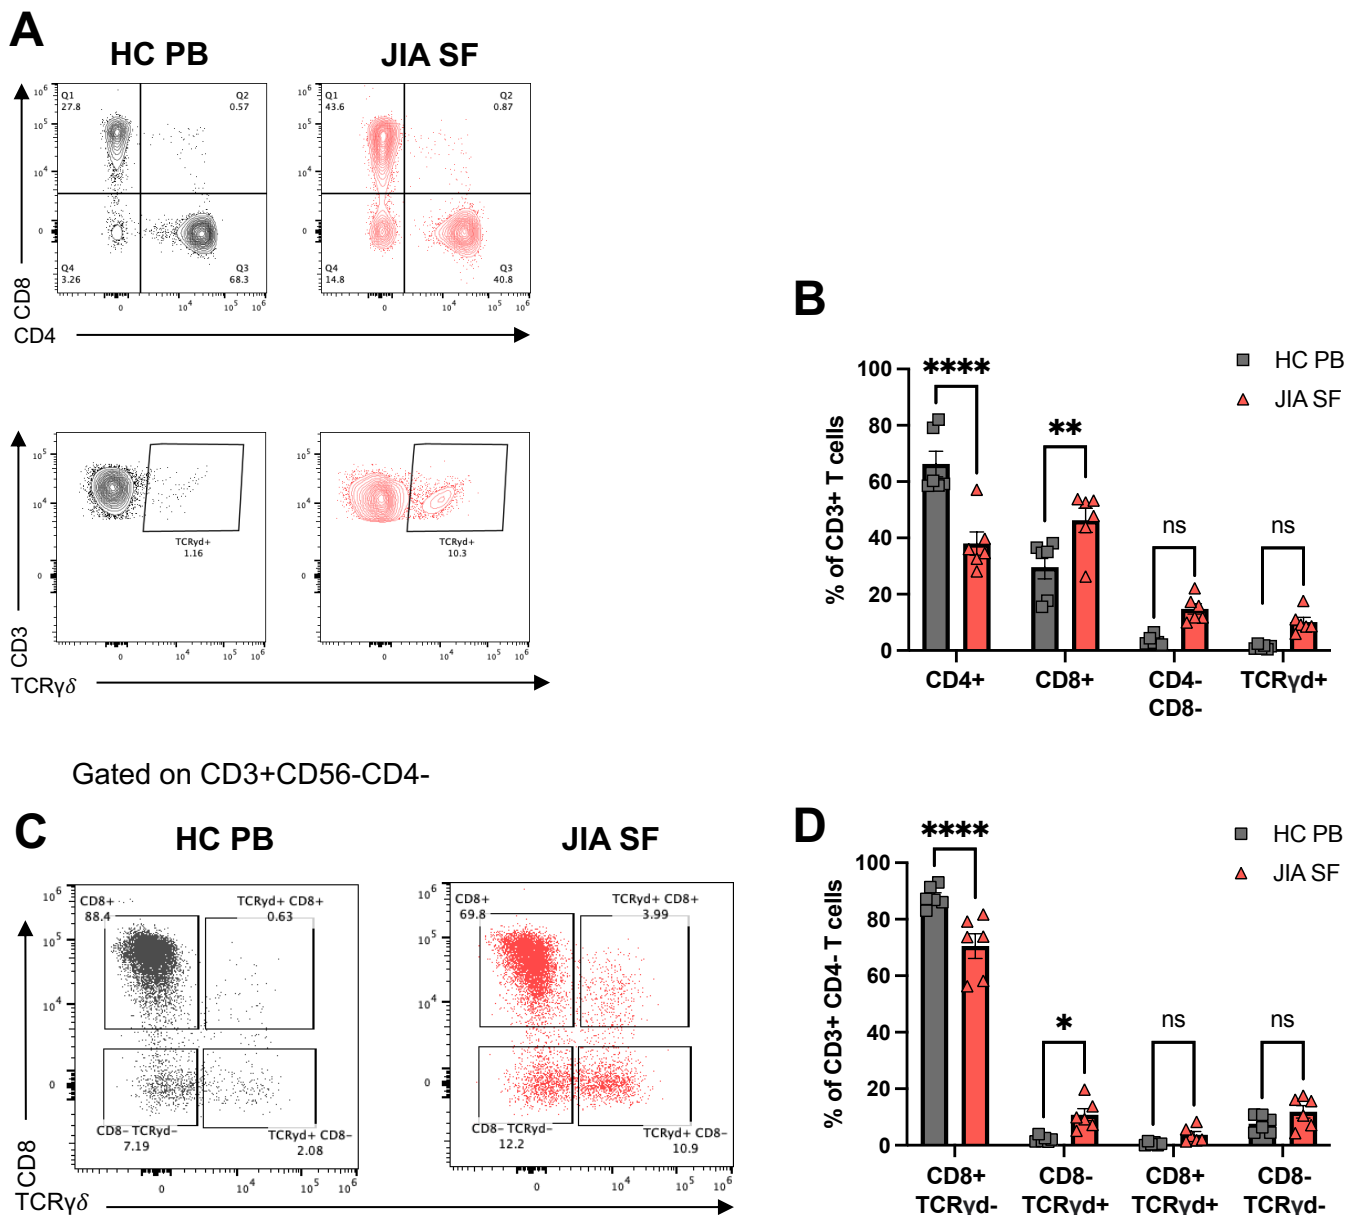

Gated on CD3+CD56-CD4-

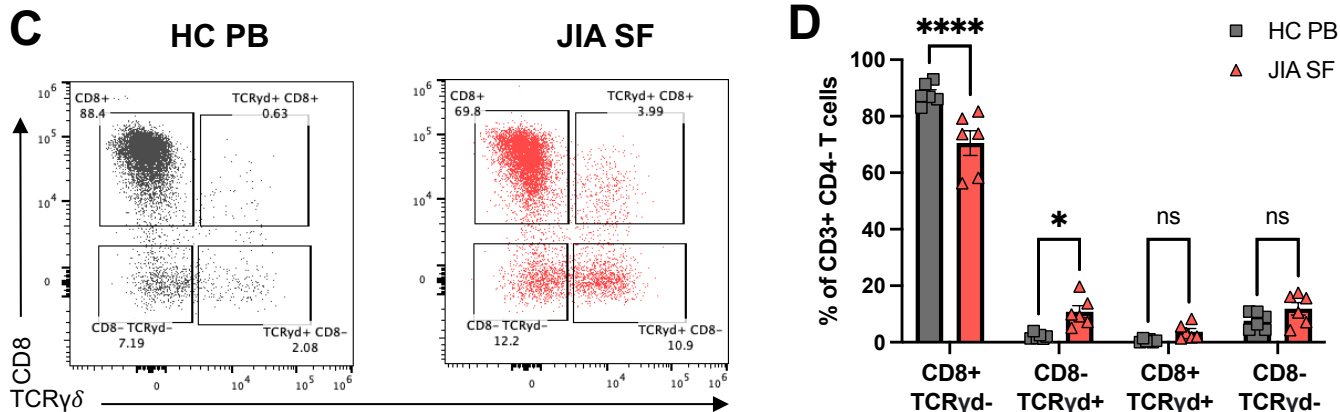

Gated on CD3-CD56+

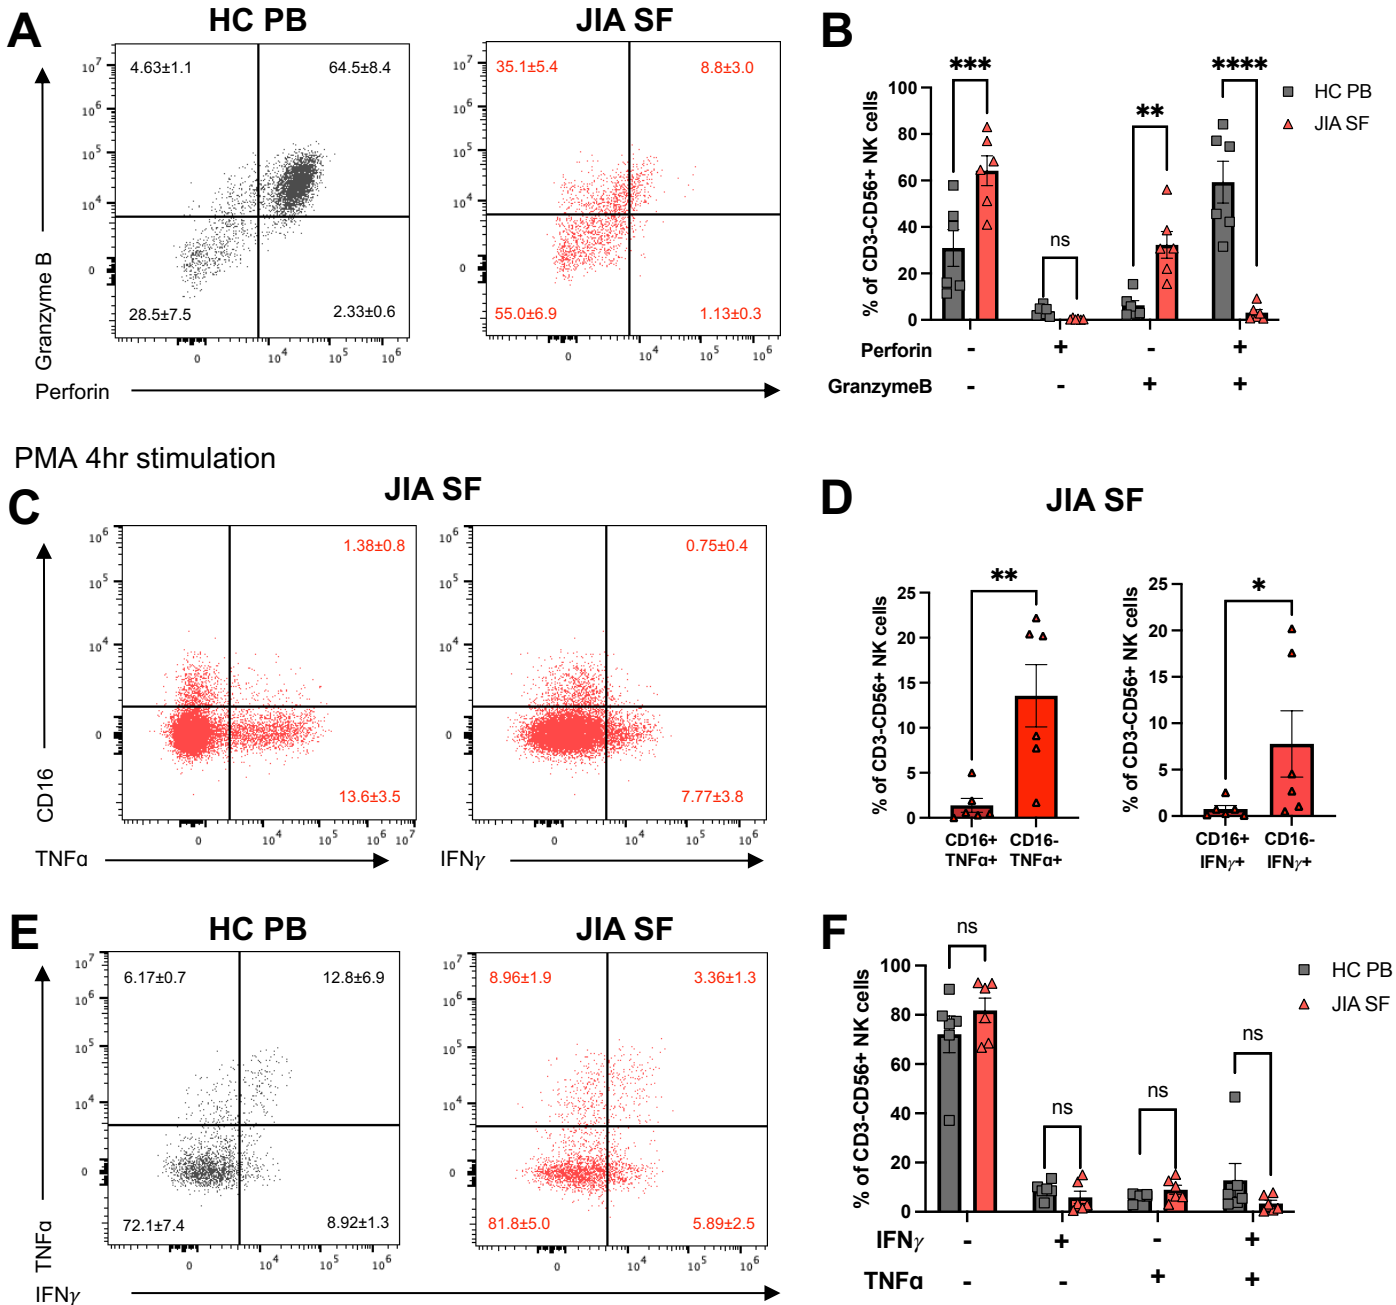

### Supplementary Figure S5. Cytotoxicity and cytokine production of NK cells in blood and SF

Additional spectral flow cytometry panels run on healthy control peripheral blood (HC PB, n=6) and Juvenile Idiopathic Arthritis synovial fluid (JIA SF, n=6). A) Expression of cytotoxic molecules perforin and granzymeB in NK cells (CD3-CD56+) in HC PB and SF, incubated for 4 hours with brefeldin A. Singular representative plot with mean±SEM of frequencies of all samples displayed. B) Differences in frequencies of cytotoxic molecule expression of NK cells between HC PB and JIA SF. C-D) TNF $\alpha$  and IFN $\gamma$  expression in CD16+ and CD16- SF NK cells (CD3-CD56+) after 4 hours stimulation with PMA, ionomycin and brefeldin A. Concatenated plot of all samples with mean±SEM of frequencies of all samples displayed. E) Expression of TNF $\alpha$  and IFN $\gamma$  in NK cells (CD3-CD56+) in HC PB and SF, incubated for 4 hours with PMA, ionomycin and brefeldin A. Singular representative plot with mean±SEM of frequencies of all samples displayed. F) Differences in frequencies of cytokine expression of NK cells between HC PB and JIA SF. mean±SEM displayed. Significance determined by Mann-Whitney test (D) or by two-way ANOVA with Tukey's multiple comparison post hoc test (B and F). \*p<0.05, \*\*p<0.01, \*\*\*p<0.001, \*\*\*\*p<0.0001, ns= not significant (p $\geq$ 0.05).

# JIA SF CD3+

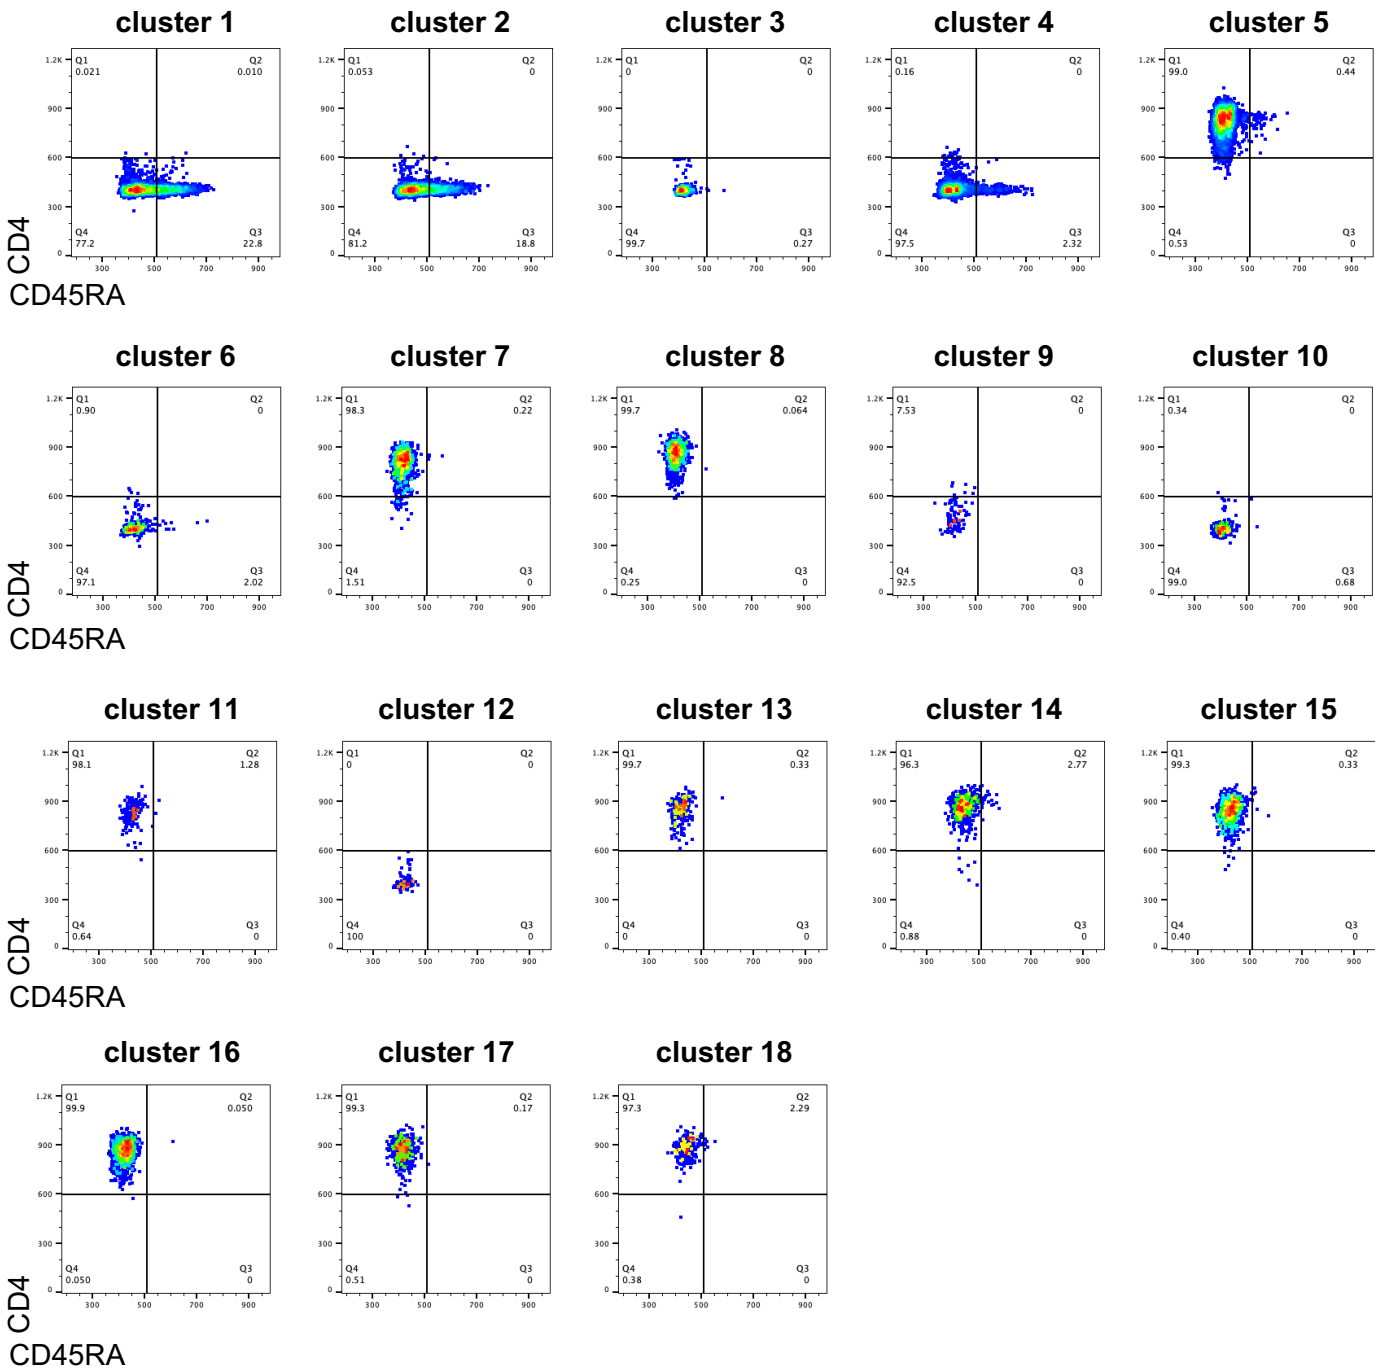

## Supplementary Figure S6. The majority of SF CD3+ T cells have a memory phenotype

Representative FACS plots of each cluster, normalised and concatenated from all JIA SF CD3+ T cell samples (n=18) in CD3+ T cell clustering (clusters 1-18). Frequencies of quadrants displayed as a proportion of each cluster.

Gated on CD4<sup>-</sup> from JIA SF CD3<sup>+</sup> T cells

**A**

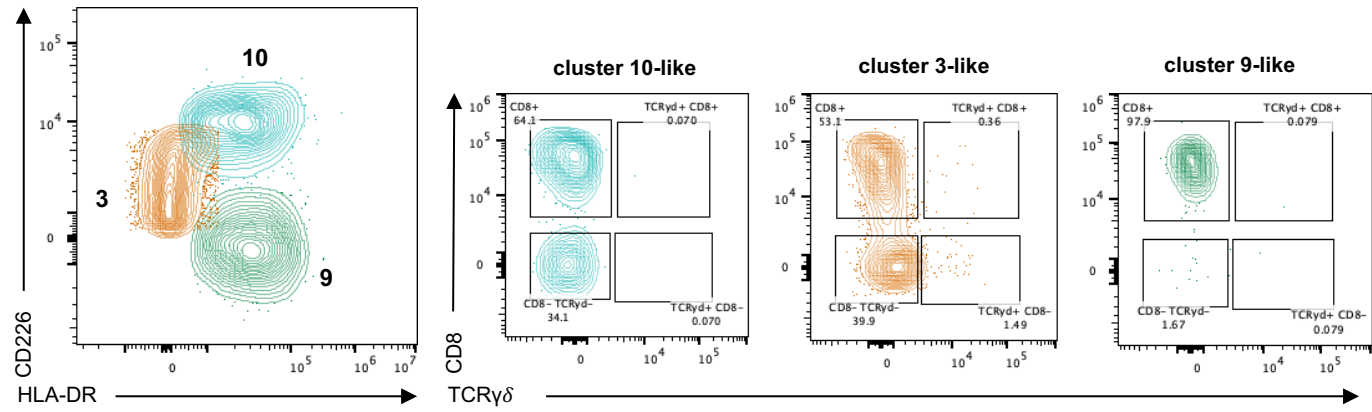

**B**

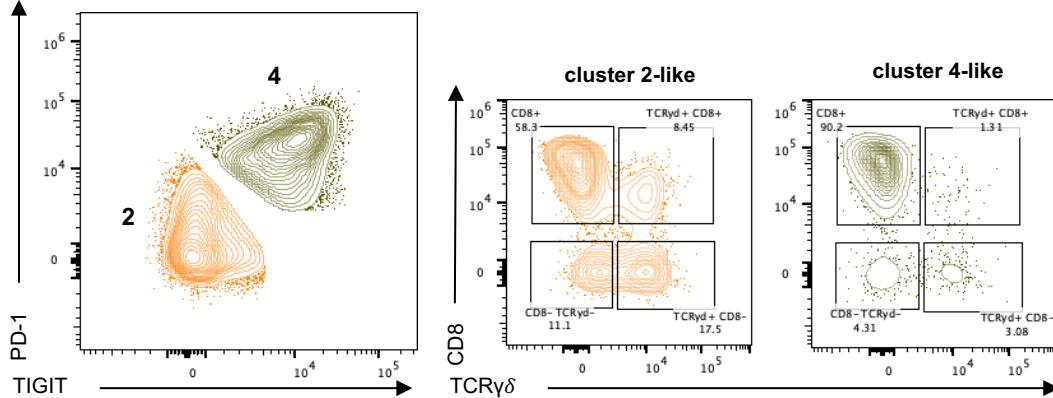

**C**

Gated on JIA SF CD3<sup>+</sup> T cells

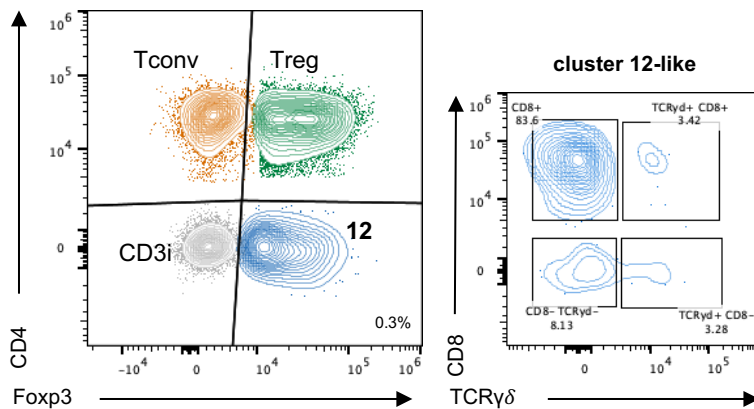

**Supplementary Figure S7. Lineage identities of CD3<sup>+</sup> CD4<sup>-</sup> T cell clusters in SF**

Additional spectral flow cytometry panel run on Juvenile Idiopathic Arthritis synovial fluid (JIA SF, n=6) to identify additional lineages of CD4<sup>-</sup> SF T cell populations described in CD3<sup>+</sup> clustering. 'Cluster-like' populations were identified by the following gating strategies on CD3<sup>+</sup>CD56<sup>-</sup>CD4<sup>-</sup>: CD161<sup>-</sup>CD69<sup>+</sup>TIGIT<sup>-</sup>PD-1<sup>low</sup> (cluster 2); CD161<sup>+</sup>CD39<sup>+</sup>HLA-DR<sup>-</sup>CD226<sup>int</sup> (cluster 3); CD161<sup>+</sup>CD69<sup>+</sup>PD-1<sup>+</sup>TIGIT<sup>+</sup> (cluster 4); CD161<sup>+</sup>CD39<sup>+</sup>HLA-DR<sup>+</sup>CD226<sup>-</sup> (cluster 9); CD161<sup>+</sup>CD39<sup>+</sup>HLA-DR<sup>+</sup>CD226<sup>high</sup> (cluster 10). Cluster 12 was gated on CD4<sup>+</sup>Foxp3<sup>+</sup> from all live CD3<sup>+</sup> T cells. CD8 and TCRγδ expression of A) cluster3,9 and 10-like, B) cluster2 and 4-like, and C) cluster 12-like CD4<sup>-</sup> T cells in SF. Concatenated plots of all samples for each group with percentages shown.



Gated on CD8+ within CD4- clusters from JIA SF CD3+ T cells

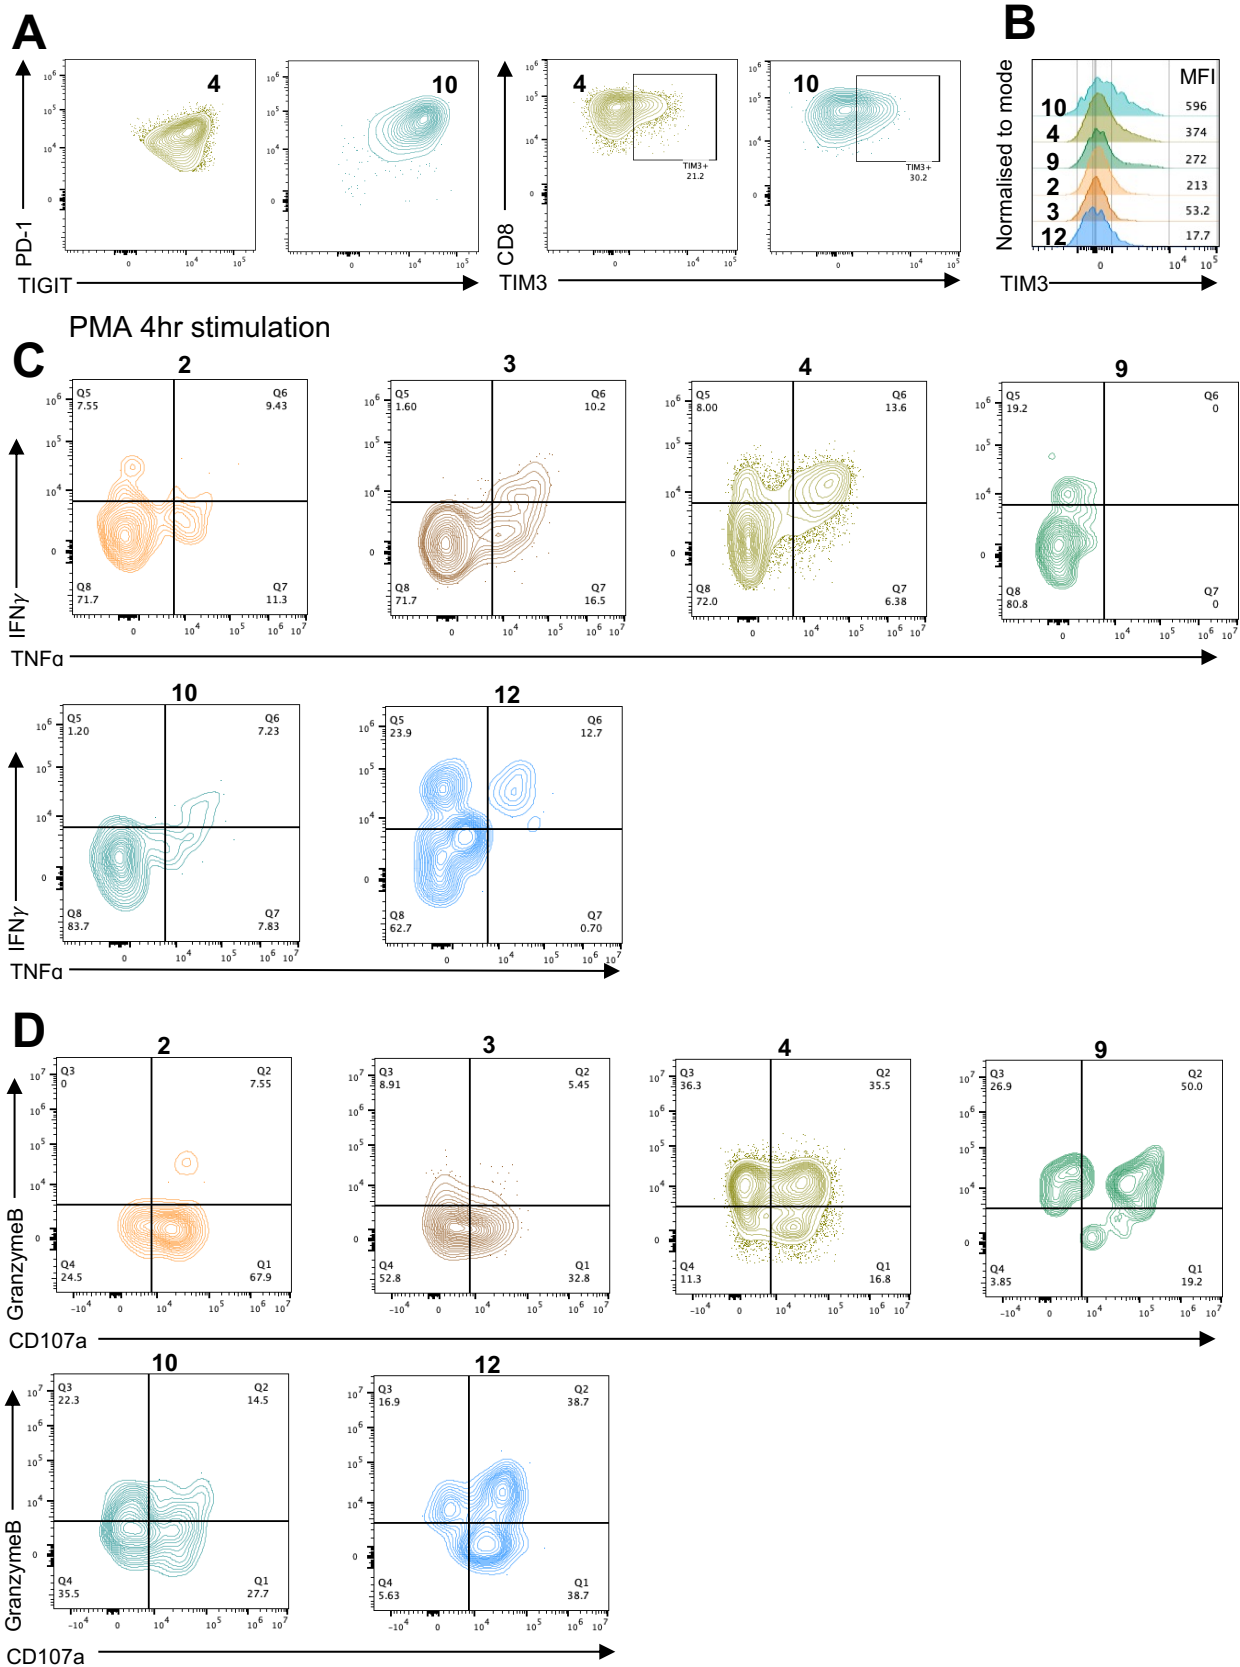**Supplementary Figure S8. Cytokine production and cytotoxic capabilities of CD8+ T cells within CD4- SF clusters**

Additional spectral flow cytometry panels run on Juvenile Idiopathic Arthritis synovial fluid (JIA SF, n=6) to identify additional lineages of CD4- SF T cell populations described CD3+ clustering. 'Cluster-like' populations were identified by gating strategies as described in supplementary figure S5, with further gating on CD8+. A) TIM3 expression on SF TIGIThighPD-1high clusters (cluster 4 and 10-like) with B) median fluorescence intensities (MFI) compared to other SF cluster-like populations. Cytokine (C) production and cytotoxic molecules (D) produced by each cluster-like CD4- T cell population in SF assessed after 4 hours PMA, ionomycin and brefeldin A stimulation. Concatenated plots of all samples for each group with percentages shown.

**Table S2. JIA PB cohort divided by clinically active or inactive disease**

Of all JIA PBMC samples, 'Active' Juvenile Idiopathic Arthritis (JIA) PB classified by one or more clinically active joint; 'Inactive' JIA PB classified by no clinically active joints at time of sample of those where AJC data was available. Shown as mean (range) unless otherwise specified.

|                                                          | JIA PBMC 'Inactive'          | JIA PBMC 'Active'             |
|----------------------------------------------------------|------------------------------|-------------------------------|
| <b>Number of participants, n</b>                         | 17                           | 29                            |
| <b>Gender, % Female</b>                                  | 88.2                         | 65.5                          |
| <b>Age at sample in years, mean (range)</b>              | 9.6 (2-18)                   | 5.7 (1-16)                    |
| <b>Ethnicity, % Caucasian</b>                            | 82.3                         | 62.1                          |
| <b>Disease duration:</b>                                 |                              |                               |
| <b>Time since diagnosis, months (range) <sup>◇</sup></b> | 47.1 (3-125)                 | 31.6 (2-105)                  |
| <b>JIA subtype:</b>                                      |                              |                               |
| <b>% RF- Polyarticular</b>                               | 64.7                         | 21.4                          |
| <b>% Oligoarticular</b>                                  | 35.3                         | 78.6                          |
| <b>Medication at time of sample:</b>                     |                              |                               |
| <b>Methotrexate, n</b>                                   | Yes= 11<br>No= 6             | Yes= 15<br>No= 14             |
| <b>Steroids, n <sup>▽</sup></b>                          | Yes= 10<br>No= 7             | Yes= 13<br>No= 15             |
| <b>Biologics, n</b>                                      | Yes= 1<br>No= 16             | Yes= 3<br>No= 26              |
| <b>Clinical information at time of sample:</b>           |                              |                               |
| <b>ANA, n <sup>#</sup></b>                               | positive = 7<br>negative = 4 | positive = 21<br>negative = 6 |
| <b>AJC, mean (range)</b>                                 | 0 (0)                        | 2.03 (1-5)                    |
| <b>cJADAS, mean (range) <sup>^</sup></b>                 | 1.8 (0-8.6)                  | 7.9 (1.7-17.3)                |

PBMC= Peripheral Blood Mononuclear Cells; RF-: Rheumatoid factor negative; ANA: Antinuclear Antibodies (positive classified as titre  $\geq 1:160$ ); AJC: Active Joint Count; cJADAS: clinical Juvenile Arthritis Disease Activity Score

<sup>◇</sup> 5.9% of Inactive JIA PBMC samples missing data; <sup>▽</sup> 2.4% of Active JIA PBMC samples missing data; <sup>#</sup> 35.2% of Inactive JIA PBMC and 6.9% of Active JIA PBMC samples missing data; <sup>◆</sup> 11.5% of JIA PBMC samples missing data; <sup>^</sup> 11.8% of Inactive JIA PBMC and 13.8% of Active JIA PBMC samples missing data
